# Supplementary material for: Lemon essential oil ameliorates age-associated cognitive dysfunction via modulating hippocampal synaptic density and inhibiting acetylcholinesterase
Source: publisher site journal article supplement (doi:10.18632/aging.103179), 2020-05-11
Supplement: Supplementary file [file aging-v12i9-103179-supplementary-material-SD1.pdf]

## SUPPLEMENTARY FIGURE

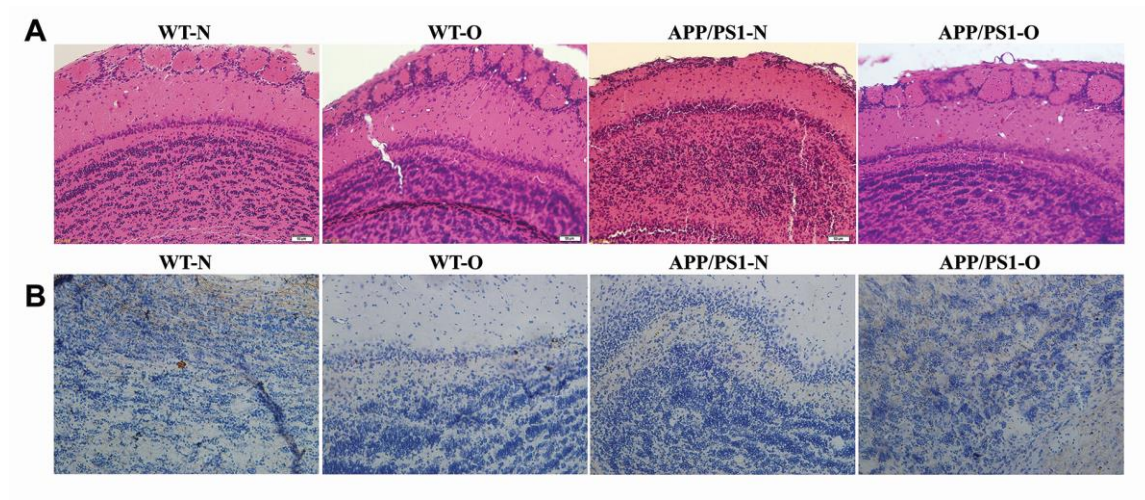

**Supplementary Figure 1. LEO may play a role through the olfactory system.** (A) H&E staining of OB in APP/PS1 and WT mice. (B) Immunostaining with anti-synaptophysin antibody in APP/PS1 and WT group. LEO: lemon essential oil.
